# Supplementary material
Source: publisher site journal article supplement (https://www.dovepress.com/article/100899)
Supplement: Supplementary file 1 [file get_supplementary_file.php%3Ff%3D100899.pdf]

## Supplementary material

### Publications analyzed and description of biobanks

#### Typology of biobanks

| Biobank or network                                                                                        | Location and ownership                             | Scope | Nature of contents                    | Financing arrangements                                                                                                                           |
|-----------------------------------------------------------------------------------------------------------|----------------------------------------------------|-------|---------------------------------------|--------------------------------------------------------------------------------------------------------------------------------------------------|
| <b>Europe</b>                                                                                             |                                                    |       |                                       |                                                                                                                                                  |
| Biobank Graz (Austria)                                                                                    | University hospital                                | D + P | Tissue, blood and derivatives         | Mixed public funding                                                                                                                             |
| Bank of Biological Material (BBM) (Prague, Czech Republic)                                                | First Faculty of Medicine of Charles University    | D     | Tissue, blood and derivatives         | 95% government, 5% institution budget                                                                                                            |
| Neuroinflammation Biobank in the Department of Neurology (Münster, Germany)                               | University hospital Münster                        | D     | Blood and derivatives, CSF            | Investment 60% industry, 33% grants, 7% institution budget; running costs (including personnel) 28% industry, 34% grants, 38% institution budget |
| Erasmus Medical Center Tissue Bank (Rotterdam, Netherlands)                                               | University hospital                                | D     | Tissue                                | institution budget, user fees                                                                                                                    |
| BancoADN or Spanish National DNA Bank Carlos III (Salamanca, Spain)                                       | University of Salamanca                            | D     | Blood and derivatives                 | Public funding, institution budget                                                                                                               |
| Centro Nacional de Investigaciones Oncológicas Tumor Bank Network (CNIO) (Madrid, Spain)                  | Research institute                                 | D     | Tissue, blood and derivatives         | Charitable funding, private and commercial donors                                                                                                |
| Spanish HIV HGM BioBank (SHIVBB) (Madrid, Spain)                                                          | University hospital                                | D     | Tissue, blood and derivatives         | 85% grants, 15% other                                                                                                                            |
| Swietokrzyski Biobank (Chęciny, Poland)                                                                   | Regional Science and Technology Center             | P     | Blood and derivatives                 | 100% institution budget                                                                                                                          |
| Biobanco-IMM (Lisbon, Portugal)                                                                           | Lisbon Academic Medical Center                     | D     | Tissue, blood and derivatives         | 49% institution budget, 49% public targeted donation/foundation, 2% user fees                                                                    |
| Uppsala Biobank (Sweden)                                                                                  | Uppsala University and Uppsala University Hospital | D     | Tissue, blood and derivatives         | 90% institution budget, 10% user fees                                                                                                            |
| Global Biobank of AstraZeneca (Sweden, UK)                                                                | Pharmaceutical company                             | D     | Tissue, blood and derivatives, others | Corporate funding                                                                                                                                |
| Nottingham Health Science Biobank (UK)                                                                    | Nottingham University Hospital Trust               | D     | Tissue, blood and derivatives         | 100% grants                                                                                                                                      |
| Infectious Diseases Biobank (IDB) at King's College London (UK)                                           | Guy's Hospital                                     | D     | Blood and derivatives                 | 75% grants, 25% other                                                                                                                            |
| Wales Cancer Bank (Cardiff, UK)                                                                           | Cardiff University                                 | D     | Tissue, blood and derivatives         | Government and charitable funding                                                                                                                |
| UK Biobank                                                                                                | Hosted by the University of Manchester             | P     | Blood, others                         | Government and charitable funding                                                                                                                |
| Abcodia (London, UK)                                                                                      | University College London spin-off                 | D     | Serum                                 | Venture capital, institution budget, mixed public funding, charitable funding                                                                    |
| Biobanking Solutions (Manchester, UK), now Center for Integrated Genomic Medical Research (CIGMR) biobank | University of Manchester                           | D + P | Tissue, blood and derivatives, others | Public funding and institution budget                                                                                                            |
| Nottingham Arthritis Pain Center (NAPC) biobank (UK)                                                      | University of Nottingham                           | D     | Tissue, blood and derivatives, others | Public funding and charitable funding                                                                                                            |
| Scleroderma and Raynaud's Research Tissue Bank (Manchester, UK)                                           | University of Manchester                           | D     | Tissue, blood and derivatives, others | General research funds of principal investigator, institution budget, public funding                                                             |
| UK Brain Banks Network                                                                                    | Coordinated by the University of Edinburgh         | D     | Tissue, blood and derivatives         | Public funding and UK clinical research collaboration (research infrastructure)                                                                  |

| Access arrangements | Cost recovery: access fees                                                                                        | Fee-for-service | Website                                                                                                                                                                                   | Reference(s) |
|---------------------|-------------------------------------------------------------------------------------------------------------------|-----------------|-------------------------------------------------------------------------------------------------------------------------------------------------------------------------------------------|--------------|
| Controlled          | Handling                                                                                                          | Yes             | <a href="http://www.medunigraz.at/strategische-projekte/biobank">http://www.medunigraz.at/strategische-projekte/biobank</a>                                                               | 1            |
| Controlled          |                                                                                                                   |                 | <a href="http://biobanka.lf1.cuni.cz/en">http://biobanka.lf1.cuni.cz/en</a>                                                                                                               | 2            |
|                     |                                                                                                                   |                 | NA                                                                                                                                                                                        | 3            |
| Controlled          | Tiered-fee schedule                                                                                               | Yes             | <a href="http://www.erasmusmc.nl/pathologie/tissuebank/?lang=en">http://www.erasmusmc.nl/pathologie/tissuebank/?lang=en</a>                                                               | 4            |
| Controlled          | Tiered-fee schedule, price list available online                                                                  | Yes             | <a href="http://www.bancoadn.org/en">http://www.bancoadn.org/en</a>                                                                                                                       | 5, 6         |
| Controlled          | Fixed cost per case, additional charges for nonstandard procedures                                                |                 | <a href="https://www.cnio.es/ing/servicios/biobanco/index.asp">https://www.cnio.es/ing/servicios/biobanco/index.asp</a>                                                                   | 6            |
| Controlled          | Shipping only                                                                                                     |                 | NA                                                                                                                                                                                        | 7            |
|                     |                                                                                                                   |                 | <a href="http://biobank.rcnt.pl/en">http://biobank.rcnt.pl/en</a>                                                                                                                         | 8            |
| Controlled          |                                                                                                                   |                 | <a href="http://biobanco.pt/?setLn=en">http://biobanco.pt/?setLn=en</a>                                                                                                                   | 9, 10        |
| Controlled          |                                                                                                                   |                 | <a href="http://www.uppsalabiobank.uu.se/en">http://www.uppsalabiobank.uu.se/en</a>                                                                                                       | 11           |
| Controlled          | Free to internal users, external access via collaborations only                                                   |                 | NA                                                                                                                                                                                        | 12, 13       |
| Controlled          | Tiered-fee schedule                                                                                               | Yes             | <a href="http://nuhrise.org/nottingham-health-science-biobank">http://nuhrise.org/nottingham-health-science-biobank</a>                                                                   | 14           |
| Controlled          | Tiered-fee schedule                                                                                               | Yes             | <a href="http://www.kcl.ac.uk/lsm/research/divisions/diuid/about/facilities/biobank/index.aspx">http://www.kcl.ac.uk/lsm/research/divisions/diuid/about/facilities/biobank/index.aspx</a> | 15, 16       |
| Controlled          | Fixed-fee schedule (handling, processing, data provided), price list available online                             | Yes             | <a href="http://www.walescancerbank.com">http://www.walescancerbank.com</a>                                                                                                               | 17           |
| Controlled          | Fixed-fee schedule (administrative fee, data, samples), price list available online                               |                 | <a href="http://www.ukbiobank.ac.uk">http://www.ukbiobank.ac.uk</a>                                                                                                                       | 6            |
| Controlled          | Flexible contractual and financial arrangements                                                                   | Yes             | <a href="http://www.abcodia.com/serum_new.php">http://www.abcodia.com/serum_new.php</a>                                                                                                   | 12, 13       |
| Controlled          | Flexible contractual and financial arrangements                                                                   | Yes             | <a href="http://www.population-health.manchester.ac.uk/biobanking">http://www.population-health.manchester.ac.uk/biobanking</a>                                                           | 12, 13       |
| Controlled          | Cost recovery for commercial users. Contracts drawn individually: costs calculated for users on an as-needs basis |                 | <a href="https://www.nottingham.ac.uk/paincentre/research/epidemiologyandbiobanks.aspx">https://www.nottingham.ac.uk/paincentre/research/epidemiologyandbiobanks.aspx</a>                 | 12, 13       |
| Controlled          | No charge                                                                                                         |                 | <a href="http://www.inflammation-repair.manchester.ac.uk/scleroderma/research/tissuebank">http://www.inflammation-repair.manchester.ac.uk/scleroderma/research/tissuebank</a>             | 12, 13       |
| Controlled          | Fixed-fee schedule (sample, administrative fee, packaging, shipping), price list available online                 |                 | <a href="http://www.mrc.ac.uk/research/facilities-and-resources-for-researchers/brain-banks">http://www.mrc.ac.uk/research/facilities-and-resources-for-researchers/brain-banks</a>       | 12, 13       |

(Continued)

(Continued)

| <b>Biobank or network</b>                                                                                                    | <b>Location and ownership</b>              | <b>Scope</b> | <b>Nature of contents</b>                         | <b>Financing arrangements</b>                                                                                                             |
|------------------------------------------------------------------------------------------------------------------------------|--------------------------------------------|--------------|---------------------------------------------------|-------------------------------------------------------------------------------------------------------------------------------------------|
| Confederation of Cancer Biobanks (UK)                                                                                        |                                            | D            | Tissue, blood and derivatives                     | Collaboration between biobanks, each with its own funding sources                                                                         |
| EuroBioBank (EU)                                                                                                             | Coordinated by Fondazione Telethon (Italy) | D            | Tissue, derivatives, cell lines                   | European Commission, institution budget, charitable funding                                                                               |
| Organization of European Cancer Institutes (OEI) – Tubafrost: European human tumor frozen tissue bank (EU)                   |                                            | D            | Tissue, blood and derivatives, cell lines         | European Commission, public targeted donation/foundation                                                                                  |
| Biobanking and BioMolecular Resources Research Infrastructure: European Research Infrastructure Consortium (BBMRI-ERIC) (EU) | Headquarters in Graz (Austria)             | D + P        | Tissue, blood and derivatives, cell lines, others | European Commission, membership contributions                                                                                             |
| Picardie Biobank (Amiens, France)                                                                                            | University hospital                        | D + P        | Tissue, blood and derivatives, cell lines         | 50% institution budget, 30% public funding, 13% research grants, 7% user fees                                                             |
| Necker-Enfants Malades Tissue Cell-Somatic-Genetics Bank (Paris, France)                                                     | University hospital                        | D            |                                                   | 90% public funding, 10% institution budget                                                                                                |
| Jean Dausset Foundation: CEPH BRC (Paris, France)                                                                            | Public research foundation                 | D + P        | Blood and derivatives, cell lines                 | Public funding (Ministry of Health), research grants (from EU and National Institute of Cancer, INCa)                                     |
| Quinze-Vingts National Ophthalmology Hospital BRC (Paris, France)                                                            | Hospital                                   | D            | Tissue, blood and derivatives, others             | 70% research grants, 30% institution budget                                                                                               |
| Bichat-Claude Bernard Hospital BRC (Paris, France)                                                                           | Hospital                                   | D + P        | Tissue, blood and derivatives, others             | 70% research grants, 20% institution budget, 10% public funding                                                                           |
| Grenoble University Hospital BRC (Grenoble, France)                                                                          | University hospital                        | D            |                                                   | 100% public funding                                                                                                                       |
| CRLCC Paul Strauss Biobank (Strasbourg, France)                                                                              | Hospital                                   | D + P        | Tissue, blood and derivatives                     | 50% institution budget, 50% research grants                                                                                               |
| EPIGENETEC Saints Pères BRC (Paris, France)                                                                                  | Public research institute                  | D            | Tissue, blood and derivatives, others             | 50% research grants, 30% public funding, 15% institution budget, 5% others                                                                |
| Gene–environment interaction in cardiovascular physiopathology BRC (Nancy, France)                                           | University                                 | P            | DNA                                               | 50% research grants, 30% institution budget, 10% public funding, 10% private funding from industry                                        |
| Institut Paoli Calmettes (IPC) oncology BRC (Marseille, France)                                                              | Cancer center                              | D            | Tissue, blood and derivatives                     | 70% institution budget, 10% public funding, 10% research grants, 5% private funding from industry, 5% public targeted donation/foundation |
| REFGENSEP French Multiple Sclerosis genetic network (Paris, France)                                                          | Hospital                                   | D            | DNA, cell lines                                   | 30% institution budget, 30% research grants, 30% public targeted donation/foundation, 10% private funding from industry                   |
| Champagne Ardenne Tumor Bank (Reims, France)                                                                                 | Hospital                                   | D            | Tissue, blood and derivatives                     | 90% public funding, 10% institution budget                                                                                                |
| Jean Godinot Institute Tumor Bank (Reims, France)                                                                            | Cancer center                              | D            | Tissue, serum                                     | 74% institution budget, 26% public funding                                                                                                |
| AP-HM Marseille Hospitals Tumor Bank (Marseille, France)                                                                     | Hospital                                   | D            | Tissue                                            | 40% institution budget, 40% public funding, 15% research grants, 5% public targeted donation/foundation                                   |
| CHU-CAL-UNSA Tumor Bank (Nice, France)                                                                                       | University hospital                        | D            | Tissue, blood and derivatives, cell lines         | 70% institution budget, 20% research grants, 10% public funding                                                                           |
| Cochin Hospital Tumor Bank (Paris, France)                                                                                   | Hospital                                   | D            | Tissue and derivatives                            | 55% public funding, 45% institution budget                                                                                                |

| <b>Access arrangements</b> | <b>Cost recovery: access fees</b>                                           | <b>Fee-for-service</b> | <b>Website</b>                                                                      | <b>Reference(s)</b> |
|----------------------------|-----------------------------------------------------------------------------|------------------------|-------------------------------------------------------------------------------------|---------------------|
| Controlled                 | Fixed-fee schedule (retrieving, processing, and dispatching)                |                        | <a href="http://ccb.ncri.org.uk">http://ccb.ncri.org.uk</a>                         | 6                   |
|                            | Varies by participating bank: processing and shipping fees apply            |                        | <a href="http://www.eurobiobank.org">http://www.eurobiobank.org</a>                 | 6                   |
| Controlled                 | Provider negotiates directly with the requestor regarding cost compensation |                        | <a href="http://www.tubafrost.org/index.php">http://www.tubafrost.org/index.php</a> | 6                   |
|                            |                                                                             |                        | <a href="http://www.bbMRI-eric.eu">http://www.bbMRI-eric.eu</a>                     | 18                  |
|                            | Tiered-fee schedule, free of charge for public sector                       | Yes                    | [Questionnaire]                                                                     | NA                  |
| Controlled                 | No access fee or cost recovery                                              |                        | [Questionnaire]                                                                     | NA                  |
| Controlled                 | Cost recovery not otherwise specified                                       | Yes                    | [Questionnaire]                                                                     | NA                  |
| Controlled                 |                                                                             |                        | [Questionnaire]                                                                     | NA                  |
|                            | Tiered-fee schedule, free of charge for public sector                       |                        | [Questionnaire]                                                                     | NA                  |
|                            | Tiered-fee schedule                                                         |                        | [Questionnaire]                                                                     | NA                  |
| Controlled                 | No access fee or cost recovery                                              |                        | [Questionnaire]                                                                     | NA                  |
|                            | Cost recovery not otherwise specified                                       | Yes                    | [Questionnaire]                                                                     | NA                  |
|                            | Tiered-fee schedule, free of charge for public sector                       |                        | [Questionnaire]                                                                     | NA                  |
|                            | Tiered-fee schedule, free of charge for public sector                       |                        | [Questionnaire]                                                                     | NA                  |
|                            | Fixed-fee schedule                                                          |                        | [Questionnaire]                                                                     | NA                  |
| Controlled                 | No access fee or cost recovery                                              |                        | [Questionnaire]                                                                     | NA                  |
| Controlled                 | No access fee or cost recovery                                              |                        | [Questionnaire]                                                                     | NA                  |
| Controlled                 | Tiered-fee schedule                                                         |                        | [Questionnaire]                                                                     | NA                  |
|                            | Tiered-fee schedule, free of charge for public sector                       |                        | [Questionnaire]                                                                     | NA                  |
| Controlled                 | Tiered-fee schedule, free of charge for public sector                       |                        | [Questionnaire]                                                                     | NA                  |

(Continued)

(Continued)

| <b>Biobank or network</b>                                                                                                              | <b>Location and ownership</b>   | <b>Scope</b> | <b>Nature of contents</b>            | <b>Financing arrangements</b>                                                                                           |
|----------------------------------------------------------------------------------------------------------------------------------------|---------------------------------|--------------|--------------------------------------|-------------------------------------------------------------------------------------------------------------------------|
| Saint Etienne BRC - Tumor Bank (Saint Etienne, France)                                                                                 | University hospital             | D            | Frozen tissue, blood and derivatives | 60% public funding, 30% institution budget, 10% research grants                                                         |
| Saint Louis Hospital Tumor Bank (Paris, France)                                                                                        | Hospital                        | D            | Blood and derivatives                | 100% public funding                                                                                                     |
| Ouest Atlantique-Thorax Biobank (Nantes, France)                                                                                       | Hospital                        | D            | DNA                                  | 67% targeted donation/foundation, 16% institution budget, 13% research grants, 6% public funding                        |
| Nancy University Hospital BRC (Nancy, France)                                                                                          | University hospital             | D            | Tissue and derivatives               | 64% institution budget, 28% research grants, 8% others                                                                  |
| BRC Toxoplasma (Reims and Limoges, France)                                                                                             | University hospital             | D            | DNA                                  | 65% institution budget, 30% research grants, 5% user fees                                                               |
| Clinical Research Center CIC 0204-CRB (Rouen, France)                                                                                  | University hospital             | D            | Blood and derivatives                | 100% institution budget                                                                                                 |
| Ferdinand Cabanne BRC (Dijon, France)                                                                                                  | Hospital                        | D            | Tissue, blood and derivatives        | 71% public funding, 15% research grants, 11% institution budget, 3% user fees                                           |
| COPACETIC study (Netherlands)                                                                                                          | Managed by the Netherlands      | D            | DNA                                  | 100% research grants (EC FP7 program)                                                                                   |
| Asthma follow-up cohort (longitudinal) (Netherlands)                                                                                   | University                      | D            | Tissue, blood, others                | 50% research grants, 30% public targeted donation/foundation, 10% institution budget, 10% private funding from industry |
| Asthma trios (TRIONL) (Groningen, Netherlands)                                                                                         | University                      | D            | Blood and derivatives                | 50% research grants, 30% public targeted donation/foundation, 10% institution budget, 10% private funding from industry |
| Wheezing Illnesses Study Leidsche Rijn (WHISTLER) (Utrecht, Netherlands)                                                               | University                      | P            |                                      | 70% research grants, 20% institution budget, 10% private funding from industry                                          |
| PIAMA Research Project (Utrecht, Netherlands)                                                                                          | University                      | P            | Blood and derivatives                | 70% research grants, 10% institution budget, 10% public targeted donation/foundation, 10% public funding                |
| Netherlands Cancer Institute (Amsterdam, Netherlands)                                                                                  | Hospital and research institute | D + P        | Tissue, blood and derivatives        | 95% research grants, 5% institution budget                                                                              |
| MDL: University Medical Center Nijmegen (UMCN) (Nijmegen, Netherlands)                                                                 | University hospital             | D + P        | Tissue, blood and derivatives        | 40% institution budget, 30% public funding, 20% research grants, 5% private industry funding, 5% user fees              |
| Amsterdam Cohort Studies (ACS) on HIV infection and AIDS (Netherlands)                                                                 | University hospital             | D            | Blood and derivatives                | 50% public funding, 50% institution budget                                                                              |
| Nijmegen Breast Cancer Frozen Tissue Bank (Netherlands)                                                                                | Hospital                        | D            | Tissue, blood and derivatives        | 100% institution budget                                                                                                 |
| Etiologic Research into Genetic, Occupational and Environmental Risk Factors for Anomalies in Children (AGORA) (Nijmegen, Netherlands) | University hospital             | D            | Blood and derivatives                | 90% institution budget, 9% research grants, 1% public targeted donation/foundation                                      |
| Genetic Modifiers of Traumatic Brain Injury Sequelae (Netherlands)                                                                     | University hospital             | D            | DNA                                  | 100% institution budget                                                                                                 |
| Brain Imaging Genetics (BIG) (Nijmegen, Netherlands)                                                                                   | University                      | P            | DNA                                  | 90% institution budget, 10% research grants                                                                             |
| Dutch Dyslexia Program (DDP), genetic component (Netherlands)                                                                          | University                      | D            | DNA                                  | 90% research grants, 10% institution budget                                                                             |

| <b>Access arrangements</b>                 | <b>Cost recovery: access fees</b>                                                                                                | <b>Fee-for-service</b> | <b>Website</b>  | <b>Reference(s)</b> |
|--------------------------------------------|----------------------------------------------------------------------------------------------------------------------------------|------------------------|-----------------|---------------------|
| Controlled                                 | Access fee depends on labor, consumables and reagents, etc. Price list available online                                          | Yes                    | [Questionnaire] | NA                  |
|                                            | Cost recovery not otherwise specified                                                                                            |                        | [Questionnaire] | NA                  |
|                                            | Tiered-fee schedule                                                                                                              |                        | [Questionnaire] | NA                  |
| Controlled                                 | Tiered-fee schedule                                                                                                              |                        | [Questionnaire] | NA                  |
| Controlled                                 | Tiered-fee schedule, price list available online                                                                                 |                        | [Questionnaire] | NA                  |
|                                            | No access fee or cost recovery                                                                                                   |                        | [Questionnaire] | NA                  |
| Controlled                                 | Tiered-fee schedule                                                                                                              | Yes                    | [Questionnaire] | NA                  |
|                                            | Tiered-fee schedule                                                                                                              |                        | [Questionnaire] | NA                  |
|                                            | No access fee or cost recovery                                                                                                   |                        | [Questionnaire] | NA                  |
|                                            | No access fee or cost recovery                                                                                                   |                        | [Questionnaire] | NA                  |
|                                            | Tiered-fee schedule, free of charge for public sector                                                                            |                        | [Questionnaire] | NA                  |
|                                            | Tiered-fee schedule, free of charge for public sector                                                                            |                        | [Questionnaire] | NA                  |
|                                            |                                                                                                                                  |                        | [Questionnaire] | NA                  |
|                                            | Cost recovery not otherwise specified                                                                                            |                        | [Questionnaire] | NA                  |
| Controlled access: access committee        |                                                                                                                                  |                        | [Questionnaire] | NA                  |
|                                            | Cost recovery: no charge for public sector and private not-for-profit organizations, charge for private for-profit organizations |                        | [Questionnaire] | NA                  |
|                                            | Tiered-fee schedule                                                                                                              |                        | [Questionnaire] | NA                  |
|                                            | No access fee or cost recovery                                                                                                   |                        | [Questionnaire] | NA                  |
| Controlled access: data only (not samples) |                                                                                                                                  |                        | [Questionnaire] | NA                  |
|                                            |                                                                                                                                  |                        | [Questionnaire] | NA                  |

(Continued)

(Continued)

| <b>Biobank or network</b>                                                                          | <b>Location and ownership</b>                                                                                                  | <b>Scope</b> | <b>Nature of contents</b>                 | <b>Financing arrangements</b>                                                                                                 |
|----------------------------------------------------------------------------------------------------|--------------------------------------------------------------------------------------------------------------------------------|--------------|-------------------------------------------|-------------------------------------------------------------------------------------------------------------------------------|
| International Multicenter ADHD Genetics Study, Dutch part: Image NL (Netherlands)                  | University                                                                                                                     | D            | DNA                                       | 90% institution budget, 10% research grants                                                                                   |
| Family and Health Study (FHS) (Netherlands)                                                        | University                                                                                                                     | P            | DNA                                       | 50% institution budget, 50% research grants                                                                                   |
| Nijmegen Biomedical Study (Netherlands)                                                            | University                                                                                                                     | P            | Blood and derivatives, others             | 100% institution budget                                                                                                       |
| Netherlands Cohort Study                                                                           | University                                                                                                                     | P            | Tissue, DNA                               | 50% public targeted donation/foundation, 30% research grants, 10% private funding from industry, 10% institution core funding |
| Polygene Study (Netherlands)                                                                       | University                                                                                                                     | D + P        | Blood and derivatives                     | 85% research grants, 10% institution budget, 5% private funding from industry                                                 |
| Netherlands Study of Depression and Anxiety (NESDA)                                                | University                                                                                                                     | D + P        | Blood and derivatives, cell lines, others | 75% research grants, 25% institution budget                                                                                   |
| Netherlands Twin Register (NTR) (Amsterdam, Netherlands)                                           | University                                                                                                                     | P            | Blood and derivatives, cell lines, others | 90% research grants, 10% institution budget                                                                                   |
| International Multicenter persisting ADHD collaboration Dutch part: Impact NL (Netherlands)        | University                                                                                                                     | D            | DNA                                       | 90% institution budget, 10% research grants                                                                                   |
| Utrecht Health Project (Netherlands)                                                               | University                                                                                                                     | P            | Blood and derivatives, cell lines         | Institution budget (UMC Utrecht), public funding (ZonMW), government (VWS)                                                    |
| <b>Europe/Asia</b>                                                                                 |                                                                                                                                |              |                                           |                                                                                                                               |
| Chernobyl Tissue Bank (Russia)                                                                     | Institute of Endocrinology and Metabolism (Kiev, Ukraine) and A Tsyb Medical Radiological Research Center in (Obninsk, Russia) | D            | Tissue, blood and derivatives             | European Commission, government (USA), public targeted donation/foundation (Japan)                                            |
| <b>Asia</b>                                                                                        |                                                                                                                                |              |                                           |                                                                                                                               |
| Shanghai Biobank Network (SBN) (China)                                                             | Shanghai Clinical Research Center                                                                                              | D            | Tissue, blood and derivatives, others     | Hospital budget and grants (various percentages) for 16 biobank units, 90% grants and 10% user fees for one biobank           |
| Chiba University School of Medicine and its affiliated hospitals (Chiba, Japan)                    | Chiba University Graduate School of Medicine                                                                                   | D            | Tissue, blood and derivatives             | 100% grants from government                                                                                                   |
| Kanagawa Cancer Research and Information Association (KCRIA) Tumor Tissue Center (Yokohama, Japan) | Kanagawa Cancer Center                                                                                                         | D            | Tissue, blood and derivatives             | 97% institution budget, 2% grants, <1% user fees                                                                              |
| Yokohama City University Advanced Medical Research Center biobank (Japan)                          | Medical Research Center                                                                                                        | D            | Tissue                                    | 92.5% grants from government, 5% public targeted donation/foundation, 2.5% institution budget                                 |
| Chiba Cancer Center (CCC) biobank (Japan)                                                          | Chiba Cancer Center                                                                                                            | D            | Tissue and derivatives                    | 80% institution budget, 15% grants, 5% public targeted donation/foundation                                                    |
| Tsukuba Human Tissue Biobank (THB) (Japan)                                                         | University of Tsukuba hospital                                                                                                 | D            | Tissue                                    | 90% institution budget, 10% grants                                                                                            |
| Autopsy Tissue Bank of TMGH-Autopsy Resource (Tokyo, Japan)                                        | Tokyo Metropolitan Geriatric Hospital (TMGH)                                                                                   | P            | Tissue, serum                             | 90% institution budget, 5% grants, 5% user fees                                                                               |
| Rare Disease Bank of the Ministry of Health, Labor and Welfare (Osaka, Japan)                      | National Institute of Biomedical Innovation                                                                                    | D            | Blood and derivatives                     | 90% institution budget, 10% grants, <1% user fees                                                                             |
| National Cancer Center Hospital Biobank (Tokyo, Japan)                                             | National Cancer Center                                                                                                         | D            | Blood and derivatives                     | 60% grants, 40% institution budget                                                                                            |

| <b>Access arrangements</b>           | <b>Cost recovery: access fees</b>                     | <b>Fee-for-service</b> | <b>Website</b>                                                                                          | <b>Reference(s)</b> |
|--------------------------------------|-------------------------------------------------------|------------------------|---------------------------------------------------------------------------------------------------------|---------------------|
| Controlled access:<br>academics only |                                                       |                        | [Questionnaire]                                                                                         | NA                  |
| Controlled access:<br>academics only | No access fee or cost recovery                        |                        | [Questionnaire]                                                                                         | NA                  |
|                                      |                                                       |                        | [Questionnaire]                                                                                         | NA                  |
|                                      | Tiered-fee schedule, free of charge for public sector |                        | [Questionnaire]                                                                                         | NA                  |
|                                      | Fixed-fee schedule                                    |                        | [Questionnaire]                                                                                         | NA                  |
| Controlled access:<br>academics only | Tiered-fee schedule                                   |                        | [Questionnaire]                                                                                         | NA                  |
| Controlled access:<br>academics only | No access fee or cost recovery                        |                        | [Questionnaire]                                                                                         | NA                  |
| Controlled access:<br>academics only | No access fee or cost recovery                        |                        | [Questionnaire]                                                                                         | NA                  |
|                                      | Tiered-fee schedule, free of charge for public sector |                        | [Questionnaire]                                                                                         | NA                  |
| Controlled                           | No charge for specimens, shipping only                |                        | <a href="http://www.chernobyltissuebank.com/index.htm">http://www.chernobyltissuebank.com/index.htm</a> | 6                   |
| Closed or not specified              |                                                       |                        | NA                                                                                                      | 19–36               |
|                                      |                                                       |                        | NA                                                                                                      | 37                  |
| Controlled                           | Distributed essentially free of charge                |                        | NA                                                                                                      | 37                  |
| Controlled                           |                                                       |                        | NA                                                                                                      | 37                  |
| Controlled                           |                                                       |                        | NA                                                                                                      | 37                  |

(Continued)



(Continued)

| Biobank or network                                                                                                         | Location and ownership                                                  | Scope | Nature of contents                    | Financing arrangements                                                                                                    |
|----------------------------------------------------------------------------------------------------------------------------|-------------------------------------------------------------------------|-------|---------------------------------------|---------------------------------------------------------------------------------------------------------------------------|
| <b>Americas</b>                                                                                                            |                                                                         |       |                                       |                                                                                                                           |
| A C Camargo Hospital Biobank (Sao Paulo, Brazil)                                                                           | AC Camargo Cancer Center                                                | D     | Tissue and blood                      | Grants, institutional funds                                                                                               |
| Pediatric Immunological Disorders Biorepository (PIDBioRep) (Sao Paulo, Brazil)                                            | University of Sao Paulo Medical School, children's hospital             | D     | Tissue, blood and derivatives, others | 90% grants, 10% institution budget                                                                                        |
| Alberta Cancer Research Biorepository (ACRB) (Canada)                                                                      | Cross Cancer Institute (Edmonton) and Tom Baker Cancer Center (Calgary) | D     | Tissue, blood and derivatives         | 86% grants, 9% institution budget, 5% user fees                                                                           |
| The BC Cancer Agency Tumor Tissue Repository (BC-TTR) (Victoria, Canada)                                                   | Vancouver Island Center                                                 | D     | Tissue, blood and derivatives         | In 2010, 50% public targeted donation/foundation, 45% grants, 5% user fees; in 2014, 95% institution budget, 5% user fees |
| The Ontario Tumor Bank (Toronto, Canada)                                                                                   | Ontario Institute for Cancer Research                                   | D     | Tissue, blood and derivatives         | In 2010, 85% institution budget and 15% user fees; in 2014, 75% institution budget and 25% user fees                      |
| Réseau de Recherche sur le Cancer du FRSQ (Québec, Canada)                                                                 | Hospitals in Montreal, Sherbrooke, Québec City                          | D     | Tissue, blood and derivatives         | 70% grants, 25% public targeted donation/foundation, 5% user fees                                                         |
| Manitoba Breast Tumor Bank (Winnipeg, Canada)                                                                              | University of Manitoba                                                  | D     | Tissue, blood and derivatives         | 40% institution budget, 40% public targeted donation/foundation, 20% grants                                               |
| NCIC Clinical Trials Group Tumor/Tissue Data Repository (Kingston, Canada)                                                 | Queen's University                                                      | D     | Tissue, blood and derivatives         | 65% grants/contracts, 20% institution budget, 10% public targeted donation/foundation, 5% user fees                       |
| Research Institute of the McGill Institute University Health Center Liver Disease Biobank (RI-MUHC-LDB) (Montreal, Canada) | Hospital                                                                | D     | Tissue, blood                         | Grant, access and service fees, donations                                                                                 |
| Clinical Research Laboratory and Biobank (CRLB) (Hamilton, Canada)                                                         | Hospital                                                                | D + P | Frozen samples                        | Grants, industry and mixed public research funds                                                                          |
| Canadian Tumor Repository Network (CTRNet)                                                                                 |                                                                         | D     | Tissue, blood and derivatives, others | Government, user fees                                                                                                     |
| Conversant Bio (Huntsville, AL, USA)                                                                                       | Corporation                                                             | D     | Tissue, blood and derivatives         |                                                                                                                           |
| Biobank Core Facility (Phoenix, AZ, USA)                                                                                   | St Joseph's Hospital and Barrow Neurological Institute                  | D     | Tissue, blood, CSF, others            | Foundation and contracts                                                                                                  |
| Brain and Body Donation Program (BBDP) (Sun City, AZ, USA)                                                                 | Banner Sun Health Research Institute                                    | D     | Tissue, blood, CSF                    | Grants                                                                                                                    |
| DNASU Plasmid Repository (Tempe, AZ, USA)                                                                                  | Arizona State University                                                | O     | Plasmids                              | Grants                                                                                                                    |
| 23andMe Database/DNA biobank (Mountain View, CA, USA)                                                                      | Corporation                                                             | P     | Saliva and derivatives                | Private, venture capital                                                                                                  |
| Tissue Procurement Core (TPC) (Iowa City, IA, USA)                                                                         | University of Iowa, Carver College of Medicine                          | D + P | Tissue, blood and derivatives         | Institution budget, contracts, grants from government                                                                     |
| BWH/Harvard Cohorts Biorepository (Boston, MA, USA)                                                                        | Brigham and Women's Hospital                                            | P     | Tissue, blood and derivatives, others | Access and service fees                                                                                                   |
| Beaumont Health System BioBank (Royal Oak, MI, USA)                                                                        | Hospital                                                                | D     | Tissue, blood and derivatives, others | Public targeted donation/foundation, institution budget, government, user fees                                            |

| <b>Access arrangements</b> | <b>Cost recovery: access fees</b>                                                                                                              | <b>Fee-for-service</b> | <b>Website</b>                                                                                                                                                                                                                                                                                                                                                        | <b>Reference(s)</b> |
|----------------------------|------------------------------------------------------------------------------------------------------------------------------------------------|------------------------|-----------------------------------------------------------------------------------------------------------------------------------------------------------------------------------------------------------------------------------------------------------------------------------------------------------------------------------------------------------------------|---------------------|
| Controlled                 | Tiered-fee schedule                                                                                                                            |                        | <a href="http://www.accamargo.org.br/Biobank">http://www.accamargo.org.br/Biobank</a>                                                                                                                                                                                                                                                                                 | 38                  |
| Controlled                 |                                                                                                                                                |                        | NA                                                                                                                                                                                                                                                                                                                                                                    | 39                  |
| Controlled                 | Cost-recovery system not otherwise specified                                                                                                   | Yes                    | <a href="http://www.acrb.ca/">http://www.acrb.ca/</a>                                                                                                                                                                                                                                                                                                                 | 40                  |
| Controlled                 | Cost-recovery system not otherwise specified                                                                                                   |                        | <a href="http://www.bccrc.ca/dept/ttr">http://www.bccrc.ca/dept/ttr</a>                                                                                                                                                                                                                                                                                               | 41, 40              |
| Controlled                 | Tiered-fee schedule, price list available online                                                                                               | Yes                    | <a href="http://www.ontariotumourbank.ca">http://www.ontariotumourbank.ca</a>                                                                                                                                                                                                                                                                                         | 41, 40              |
|                            |                                                                                                                                                |                        | <a href="http://www.rrcancer.ca/en/publique/accueil">http://www.rrcancer.ca/en/publique/accueil</a>                                                                                                                                                                                                                                                                   | 41                  |
| Controlled                 | Fixed-fee schedule (sample, data, shipping), price list available online                                                                       |                        | <a href="https://www.umanitoba.ca/institutes/manitoba_institute_cell_biology/MBTB/Index4.htm">https://www.umanitoba.ca/institutes/manitoba_institute_cell_biology/MBTB/Index4.htm</a>                                                                                                                                                                                 | 41                  |
| Controlled                 |                                                                                                                                                |                        | <a href="https://www.ctg.queensu.ca/public/correlative-science-tumour-bank">https://www.ctg.queensu.ca/public/correlative-science-tumour-bank</a>                                                                                                                                                                                                                     | 41                  |
|                            | Tiered-fee schedule                                                                                                                            | Yes                    | NA                                                                                                                                                                                                                                                                                                                                                                    | 38                  |
|                            |                                                                                                                                                | Yes                    | NA                                                                                                                                                                                                                                                                                                                                                                    | 42                  |
| Controlled                 | Cost-recovery system not otherwise specified                                                                                                   | Yes                    | <a href="http://www.ctrnet.ca">http://www.ctrnet.ca</a>                                                                                                                                                                                                                                                                                                               | 6                   |
| Controlled                 |                                                                                                                                                | Yes                    | <a href="http://www.conversantbio.com">http://www.conversantbio.com</a>                                                                                                                                                                                                                                                                                               | 38                  |
| Controlled                 | Tiered cost-recovery system in development, price list provided in publication                                                                 |                        | NA                                                                                                                                                                                                                                                                                                                                                                    | 43                  |
| Controlled                 | Cost-recovery system not otherwise specified; no charge for nonprofit organizations during their pilot study investigations (up to 24 samples) |                        | <a href="https://www.bannerhealth.com/Research/Research+Institutes/Banner+Sun+Health+Research+Institute/Research/Research+Programs/Brain+and+Body+Donation/Brain+and+Tissue+Bank.htm">https://www.bannerhealth.com/Research/Research+Institutes/Banner+Sun+Health+Research+Institute/Research/Research+Programs/Brain+and+Body+Donation/Brain+and+Tissue+Bank.htm</a> | NA                  |
| Open                       | Tiered-fee schedule, shipping, price list available online                                                                                     |                        | <a href="https://dnasu.org/DNASU/Home.do">https://dnasu.org/DNASU/Home.do</a>                                                                                                                                                                                                                                                                                         | 43                  |
| Controlled                 | Data shared with or sold to third parties for purposes of scientific research and commercial applications, patents, or operating licenses      |                        | NA                                                                                                                                                                                                                                                                                                                                                                    | 44                  |
| Controlled                 | Tiered-fee schedule, price list available online                                                                                               | In progress            | <a href="https://www.icts.uiowa.edu/tissueprocurement/tissueProcurement.jsp">https://www.icts.uiowa.edu/tissueprocurement/tissueProcurement.jsp</a>                                                                                                                                                                                                                   | 45                  |
| Controlled                 | Fixed-fee schedule                                                                                                                             | Yes                    | <a href="http://cohortsbio.bwh.harvard.edu/">http://cohortsbio.bwh.harvard.edu/</a>                                                                                                                                                                                                                                                                                   | 46                  |
| Controlled                 | Commercialization of samples (contract); matrix of costs depending on type of donor, type of biospecimen                                       | In progress            | <a href="http://www.beaumont.edu/biobank/">http://www.beaumont.edu/biobank/</a>                                                                                                                                                                                                                                                                                       | 47, 48              |

(Continued)

(Continued)

| Biobank or network                                                                            | Location and ownership                                             | Scope | Nature of contents                        | Financing arrangements                                                                       |
|-----------------------------------------------------------------------------------------------|--------------------------------------------------------------------|-------|-------------------------------------------|----------------------------------------------------------------------------------------------|
| Tissue Procurement Core (TPC) (Saint Louis, MO, USA)                                          | Washington University School of Medicine at Barnes-Jewish Hospital | D     | Tissue, blood and derivatives             | Grants                                                                                       |
| Kathleen Price Bryan Brain Bank and Biorepository (Durham, NC, USA)                           | Alzheimer's Disease Research Center at Duke University             | D     | Tissue and derivatives, CSF               | Public-private partnerships, grants, public targeted donation/foundation, institution budget |
| Center for Clinical and Translational Sciences (CCTS) biobank (Houston, TX, USA)              | University of Texas Health Science Center                          | D     | Tissue, blood and derivatives, others     | Grants from government, institution budget                                                   |
| Cooperative Human Tissue Network (CHTN) (USA)                                                 |                                                                    | D     | Tissue, blood and derivatives             | Government                                                                                   |
| <b>Australia</b>                                                                              |                                                                    |       |                                           |                                                                                              |
| Australian Prostate Cancer BioResource (APCB) (Brisbane)                                      | Queensland University of Technology                                | D     | Tissue, blood and derivatives, cell lines | Government, private funding, public targeted donation/foundation                             |
| Australian Breast Cancer Tissue Bank (ABCTB) (Sydney)                                         | University of Sydney                                               | D     | Tissue, blood and derivatives             | 65% grants, 34% public targeted donation/foundation, 1% user fees                            |
| New South Wales Brain Tissue Resource Center (NSWBTRC) (Sydney)                               | University of Sydney                                               | D     | Tissue                                    | Government, institution budget                                                               |
| Tumor Bank of the Children's Hospital at Westmead (TB-CHW) (Sydney)                           | Children's hospital                                                | D     | Tissue, blood, CSF                        | Government, public funding, public targeted donation/foundation                              |
| Victorian Cancer Research Tissue Bank (Melbourne)                                             |                                                                    | D     | Tissue, blood and derivatives             | Government, public targeted donation/foundation                                              |
| Australasian Biospecimen Network (ABN) (Melbourne)                                            | Peter MacCallum Cancer Center                                      | D     | Tissue, blood and derivatives, cell lines | Government, public targeted donation/foundation                                              |
| Kathleen Cuninghame Consortium for Research into Familial Breast Cancer (kConfab) (Melbourne) | Peter MacCallum Cancer Center                                      | D     | Tissue, blood and derivatives             | Government, public targeted donation/foundation                                              |

**Abbreviations:** BRC, Biological Resource Centre; CSF, cerebrospinal fluid; D, disease-focused; D + P, disease-focused and population-based; NA, not applicable; O, other; P, population-based.

## References

1. Sargsyan K, Macheiner T, Story P, et al. Sustainability in biobanking: model of Biobank Graz. *Biopreserv Biobank*. 2015;13(6):410–420.
2. Frankova V, Jirsova K, Zima T. The Bank of Biological Material (BBM) of the First Faculty of Medicine of Charles University in Prague, Czech Republic. *Biopreserv Biobank*. 2015;13(4):299–300.
3. Posevitz-Fejfar A, Wiendl H. The neuroinflammation biobank in the Department of Neurology, University Hospital Muenster, Germany. *Biopreserv Biobank*. 2014;12(1):74–75.
4. Riegman PH. From AAA+ to BB- and on the way back again. *Biopreserv Biobank*. 2014;12(5):292–293.
5. Gonzalez-Sanchez MB, Lopez-Valeiras E, Garcia-Montero AC. Implementation of a cost-accounting model in a biobank: practical implications. *Pathobiology*. 2014;81(5–6):286–297.
6. Vaught J, Kelly A, Hewitt R. A review of international biobanks and networks: success factors and key benchmarks. *Biopreserv Biobank*. 2009;7(3):143–150.
7. [No authors listed]. The Spanish HIV HGM BioBank (SHIVBB). *Biopreserv Biobank*. 2013;11(4):253–254.
8. Swietokrzyski biobank. *Biopreserv Biobank*. 2014;12(3):222.
9. Afonso A, Pereira JP, Dias S. Biobanco-IMM, Lisbon Academic Medical Centre. *Biopreserv Biobank*. 2014;12(6):433–434.
10. Fonseca JE. Biobanco-IMM, Lisbon Academic Medical Centre: a case study. *Acta Med Port*. 2013;26(4):312–314.
11. [No authors listed]. Uppsala biobank. *Biopreserv Biobank*. 2013;11(2):129–130.
12. Gee S, Oliver R, Corfield J, Georghiou L, Yuille M. Biobank finances: a socio-economic analysis and review. *Biopreserv Biobank*. 2015;13(6):435–451.
13. Gee S, Georghiou L, Oliver R, Yuille M. *Financing UK Biobanks: Rationale for a National Biobanking Research Infrastructure*. Manchester: University of Manchester; 2013.
14. Matharoo-Ball B, Thomson BJ. Nottingham Health Science Biobank: a sustainable bioresource. *Biopreserv Biobank*. 2014;12(5):312–316.
15. Kozlakidis Z, Mant C, Cason J. Bridging the financial gap through providing contract services: a model for publicly funded clinical biobanks. *Biopreserv Biobank*. 2012;10(4):357–360.
16. [No authors listed]. The Infectious Diseases BioBank (IDB) at King's College London, United Kingdom. *Biopreserv Biobank*. 2012;10(3):295–296.
17. Parry-Jones A. Assessing the financial, operational, and social sustainability of a biobank: the Wales Cancer Bank case study. *Biopreserv Biobank*. 2014;12(6):381–388.
18. Mayrhofer MT, Holub P, Wutte A, Litton JE. BBMRI-ERIC: the novel gateway to biobanks – from humans to humans. *Bundesgesundheitsblatt Gesundheitsforschung Gesundheitsschutz*. 2016;59(3):379–384.
19. [No authors listed]. Hypertension biobank of Ruijin Hospital. *Biopreserv Biobank*. 2011;9(2):135–136.
20. [No authors listed]. The biobank unit of Shanghai Cancer Center. *Biopreserv Biobank*. 2011;9(2):134.
21. [No authors listed]. Rheumatism biobank of Changzheng Hospital. *Biopreserv Biobank*. 2011;9(2):136.
22. [No authors listed]. Bone tumor biobank of Changzheng Hospital. *Biopreserv Biobank*. 2011;9(2):136.

| Access arrangements | Cost recovery: access fees                                                                             | Fee-for-service | Website                                                                                                                                                                                                                                                                                                                                                           | Reference(s) |
|---------------------|--------------------------------------------------------------------------------------------------------|-----------------|-------------------------------------------------------------------------------------------------------------------------------------------------------------------------------------------------------------------------------------------------------------------------------------------------------------------------------------------------------------------|--------------|
| Controlled          | No charge for specimens, fee for laboratory services (reagents and consumables, infrastructure, labor) | Yes             | <a href="http://pathology.wustl.edu/research/cores/ltp/index.php">http://pathology.wustl.edu/research/cores/ltp/index.php</a> and <a href="http://icts.wustl.edu/icts-researchers/icts-cores/find-services/by-core-name/tissue-procurement-core-tpc">http://icts.wustl.edu/icts-researchers/icts-cores/find-services/by-core-name/tissue-procurement-core-tpc</a> | 49           |
| Controlled          | Tiered-fee schedule                                                                                    |                 | <a href="https://adrc.mc.duke.edu/index.php/research/brain-bank">https://adrc.mc.duke.edu/index.php/research/brain-bank</a>                                                                                                                                                                                                                                       | 50           |
| Controlled          | Handling, shipping, administrative fee                                                                 |                 | <a href="https://www.uth.edu/biobank">https://www.uth.edu/biobank</a>                                                                                                                                                                                                                                                                                             | 51           |
| Controlled          | Processing, shipping, price list available                                                             | Yes             | <a href="https://chtn.org">https://chtn.org</a>                                                                                                                                                                                                                                                                                                                   | 6            |
| Controlled          | Fixed-fee schedule, price list available online                                                        |                 | <a href="https://www.apcbioresource.org.au">https://www.apcbioresource.org.au</a>                                                                                                                                                                                                                                                                                 | 6            |
| Controlled          | Cost-recovery system not otherwise specified                                                           |                 | <a href="http://www.abctb.org.au/abctbNew2/default.aspx">http://www.abctb.org.au/abctbNew2/default.aspx</a>                                                                                                                                                                                                                                                       | 52, 53       |
| Controlled          | Cost-recovery system not otherwise specified                                                           |                 | <a href="http://sydney.edu.au/medicine/pathology/btrc/index.php">http://sydney.edu.au/medicine/pathology/btrc/index.php</a>                                                                                                                                                                                                                                       | 54           |
| Controlled          | Cost recovery in most cases, but tissue may be provided at no charge; packaging, shipping              |                 | <a href="http://www.tumourbank.chw.edu.au">http://www.tumourbank.chw.edu.au</a>                                                                                                                                                                                                                                                                                   | 55           |
| Controlled          | Tiered-fee schedule, price list available online                                                       | Yes             | <a href="https://www.viccancerbiobank.org.au">https://www.viccancerbiobank.org.au</a>                                                                                                                                                                                                                                                                             | 6            |
| Controlled          | Cost-recovery system not otherwise specified                                                           |                 | <a href="http://abrn.net">http://abrn.net</a>                                                                                                                                                                                                                                                                                                                     | 6            |
| Controlled          | Tiered-fee schedule, price list available online                                                       |                 | <a href="http://www.kconfab.org/Index.shtml">http://www.kconfab.org/Index.shtml</a>                                                                                                                                                                                                                                                                               | 6            |

23. [No authors listed]. The biobank unit of Shanghai Mental Health Center. *Biopreserv Biobank*. 2011;9(2):136–137.
24. [No authors listed]. Liver cancer biobank of Zhongshan Hospital. *Biopreserv Biobank*. 2011;9(2):135.
25. [No authors listed]. The biobank unit of Shanghai Chest Hospital. *Biopreserv Biobank*. 2011;9(2):137.
26. [No authors listed]. The biobank unit of Shanghai 9th People's Hospital. *Biopreserv Biobank*. 2011;9(2):137.
27. [No authors listed]. The biobank unit of Longhua Hospital. *Biopreserv Biobank*. 2011;9(2):137–138.
28. [No authors listed]. The biobank unit of birth defect research center. *Biopreserv Biobank*. 2011;9(2):138.
29. [No authors listed]. The biobank unit of Shanghai Children's Medical Center. *Biopreserv Biobank*. 2011;9(2):137.
30. [No authors listed]. Shanghai Biobank Network (SBN). *Biopreserv Biobank*. 2011;9(2):133.
31. [No authors listed]. The biobank unit of Shanghai Diabetes Research Center. *Biopreserv Biobank*. 2011;9(2):134.
32. [No authors listed]. The biobank unit of Renji Hospital. *Biopreserv Biobank*. 2011;9(2):134.
33. [No authors listed]. Shanghai sperm bank. *Biopreserv Biobank*. 2011;9(2):134–135.
34. [No authors listed]. The clinical biology information of Zhongshan Hospital. *Biopreserv Biobank*. 2011;9(2):135.
35. [No authors listed]. The biobank unit of Xinhua Hospital. *Biopreserv Biobank*. 2011;9(2):135.
36. [No authors listed]. Endocrine disease biobank of Ruijin Hospital. *Biopreserv Biobank*. 2011;9(2):136.
37. [No authors listed]. A network of bioresource facilities in Japan: the human bioresource consortium technical chapter (Japanese Association for Human Bioresource Research). *Biopreserv Biobank*. 2013;11(1):57–63.
38. Campos AH, Schreeder M, Parry-Jones A, et al. Addressing the challenge of financial sustainability in biobanking. *Biopreserv Biobank*. 2015;13(6):387–395.
39. [No authors listed]. Pediatric Immunological Disorders Biorepository (PIDBioRep) at University of Sao Paulo Medical School, Brazil. *Biopreserv Biobank*. 2013;11(5):324–326.
40. Albert M, Bartlett J, Johnston RN, Schacter B, Watson P. Biobank bootstrapping: is biobank sustainability possible through cost recovery? *Biopreserv Biobank*. 2014;12(6):374–380.
41. [No authors listed]. Canadian tumour repository network. *Biopreserv Biobank*. 2010;8(4):181–185.
42. McQueen MJ, Keys JL, Bamford K, Hall K. The challenge of establishing, growing and sustaining a large biobank: a personal perspective. *Clin Biochem*. 2014;47(4–5):239–244.
43. Seiler CY, Eschbacher J, Bowser R, LaBaer J. Sustainability in a hospital-based biobank and university-based DNA biorepository: strategic roadmaps. *Biopreserv Biobank*. 2015;13(6):401–409.
44. Stoeklé HC, Mamzer-Bruneel MF, Vogt G, Hervé C. 23andMe: a new two-sided data-banking market model. *BMC Med Ethics*. 2016;17:19.
45. Galbraith JW. Sustainability in the modern biorepository environment from the perspective of the Tissue Procurement Core at the University of Iowa. *Biopreserv Biobank*. 2015;13(6):430–432.
46. Sawyer SJ, Otto JM, Suh KS. Ensuring biobank value through effective utilization. *Biopreserv Biobank*. 2015;13(6):396–400.

47. Wilson GD, D'Angelo K, Pruetz BL, Geddes TJ, Larson DM, Akervall J. The challenge of sustaining a hospital-based biobank and core molecular laboratory: the Beaumont experience. *Biopreserv Biobank*. 2014;12(5):306–311.
48. Akervall J, Pruetz BL, Geddes TJ, Larson D, Felten DJ, Wilson GD. Beaumont health system biobank: a multidisciplinary biorepository and translational research facility. *Biopreserv Biobank*. 2013;11(4):221–228.
49. McDonald SA, Sommerkamp K, Egan-Palmer M, Kharasch K, Holtschlag V. Fee-for-service as a business model of growing importance: the academic biobank experience. *Biopreserv Biobank*. 2012;10(5):421–425.
50. Uzarski D, Burke J, Turner B, Vroom J, Short N. A plan for academic biobank solvency: leveraging resources and applying business processes to improve sustainability. *Clin Transl Sci*. 2015;8(5):553–557.
51. Sanner JE, Nornie KJ. The biobank at the University of Texas Health Science Center at Houston. *Biopreserv Biobank*. 2015;13(3):224–225.
52. [No authors listed]. Australian Breast Cancer Tissue Bank (ABCTB). *Biopreserv Biobank*. 2011;9(3):217.
53. Carpenter JE, Clarke CL. Biobanking sustainability: experiences of the Australian Breast Cancer Tissue Bank (ABCTB). *Biopreserv Biobank*. 2014;12(6):395–401.
54. Sutherland GT, Sheedy D, Stevens J, et al. The NSW Brain Tissue Resource Centre: banking for alcohol and major neuropsychiatric disorders research. *Alcohol*. 2016;52:33–39.
55. Zhou L, Nath N, Markovich O, Yuksel A, Roberts A, Catchpole D. The tumour bank of the Children's Hospital at Westmead. *Biopreserv Biobank*. 2015;13(2):147–148.
